# Supplementary material for: Portable Raman spectroscopy combined with machine learning for highly sensitive and rapid detection of food pollutants with flexible Ag@TiO 2 @polyester SERS substrates
Source: Royal Society of Chemistry journal article supplement (doi:10.1039/d5fb00802f), 2025-12-08
Supplement: d5fb00802f1.pdf [file d5fb00802f1.pdf]

## Electronic Supporting Materials

### Portable Raman Spectroscopy Combined with Machine Learning for High-Sensitive and Rapid Detection of Food Pollutants with Flexible Ag@TiO<sub>2</sub>@Polyester SERS Substrates

Yingying Huang <sup>a,b</sup>, Daqian Lu<sup>d</sup>, Sihang Zhang<sup>e</sup>, Shouxiang Jiang <sup>\*b,c</sup>, Yonghui Zhou<sup>a</sup>, Jiangtao Xu <sup>\*a,b</sup>

- a. College of Materials and Energy, South China Agricultural University, 510640, Guang Zhou, China
- b. School of Fashion and Textile, The Hong Kong Polytechnic University, 999077, Hong Kong, China
- c. Research Institute for Intelligent Wearable Systems, The Hong Kong Polytechnic University, Hung Hom, Kowloon, 999077, Hong Kong, China
- d. School of Optometry, The Hong Kong Polytechnic University, 999077, Hong Kong, China
- e. School of Food Science and Engineering, Hainan University, Haikou, 570228, China

E-mail: jiangtao.xu@scau.edu.cn; kinor.j@polyu.edu.hk

**Figure S1** UV-vis Spectra

**Figure S2** Raman spectra of MG and PET.

**Figure S3** Size statistics of cavity from random 100 points

**Figure S4** VB calculation based on XPS spectra

**Figure S5** Image and Raman spectra of CV

**Figure S6** Image and Raman spectra of MG

**Figure S7** Raman spectra of (a-c) mixed CV and R6G with the concentration of 10<sup>-5</sup> M and (d-f) mixed CV and R6G with the concentration of 10<sup>-6</sup> M

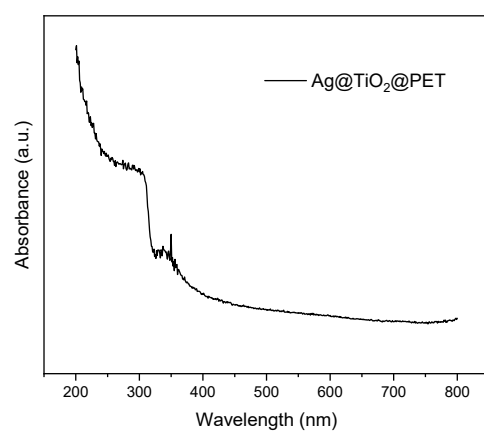

**Figure S1** UV-vis Spectra

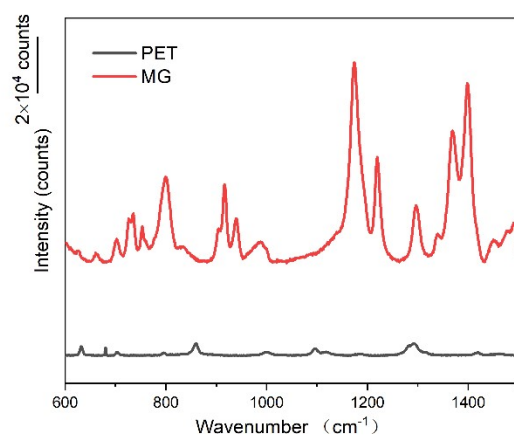

**Figure S2** Raman spectra of PET and MG.

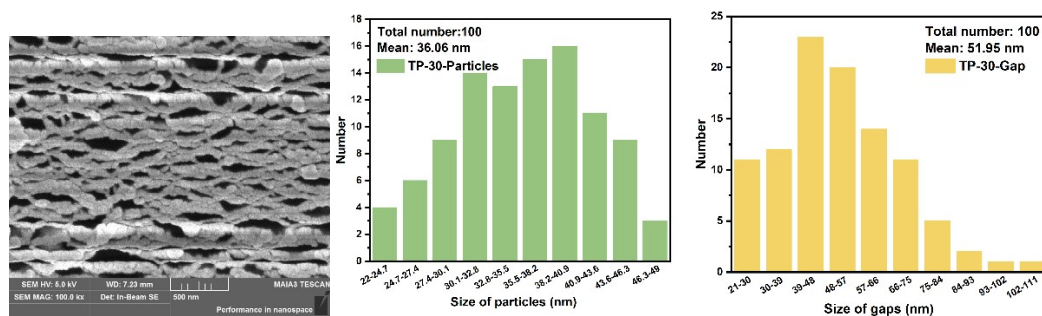

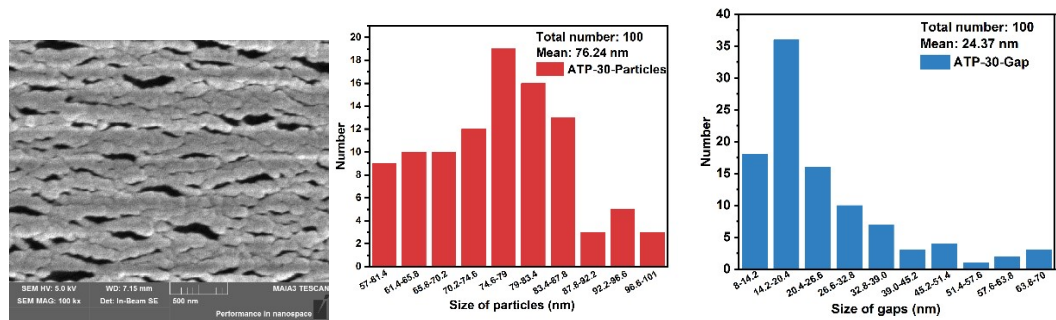

**Figure S3** Size statistics of cavity from random 100 points

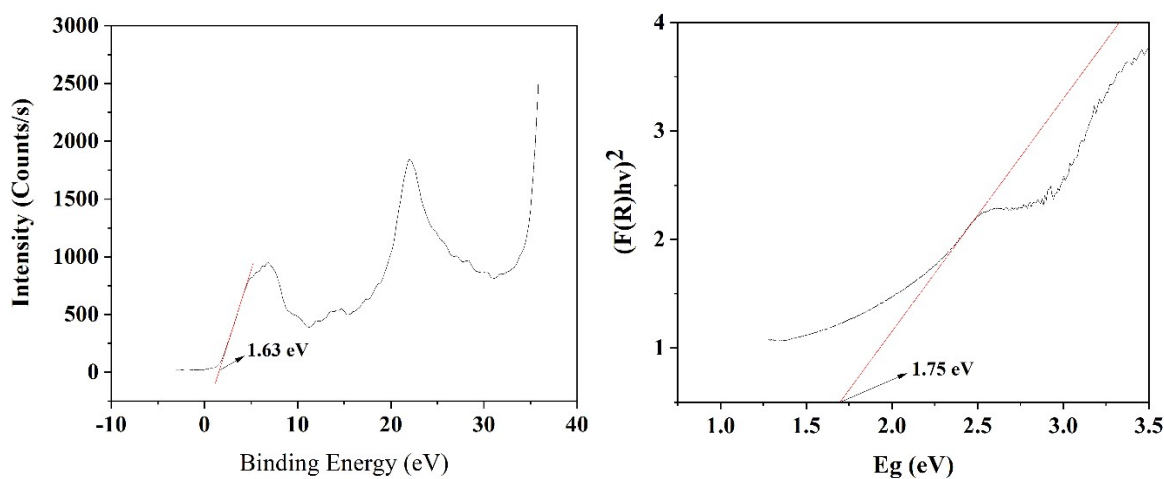

**Figure S4** VB calculation based on XPS spectra, and  $E_g$  of  $\text{TiO}_2$

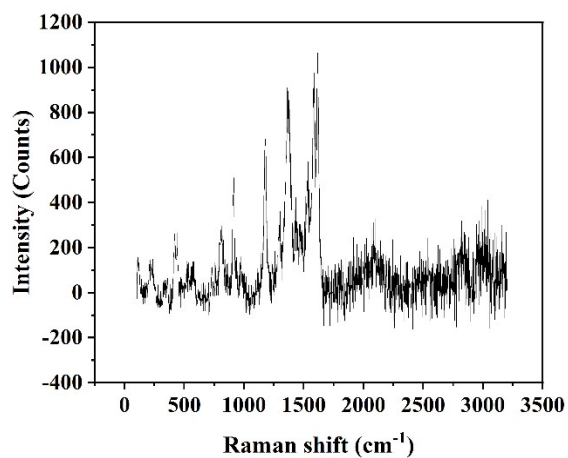

**Figure S5** Image and Raman spectra of CV powder.

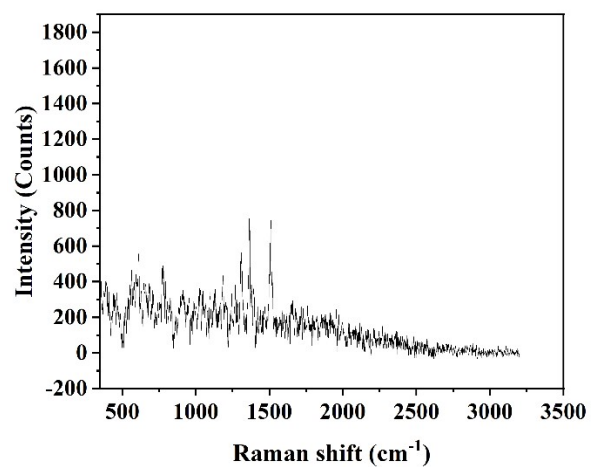

**Figure S6** Image and Raman spectra of R6G powder.

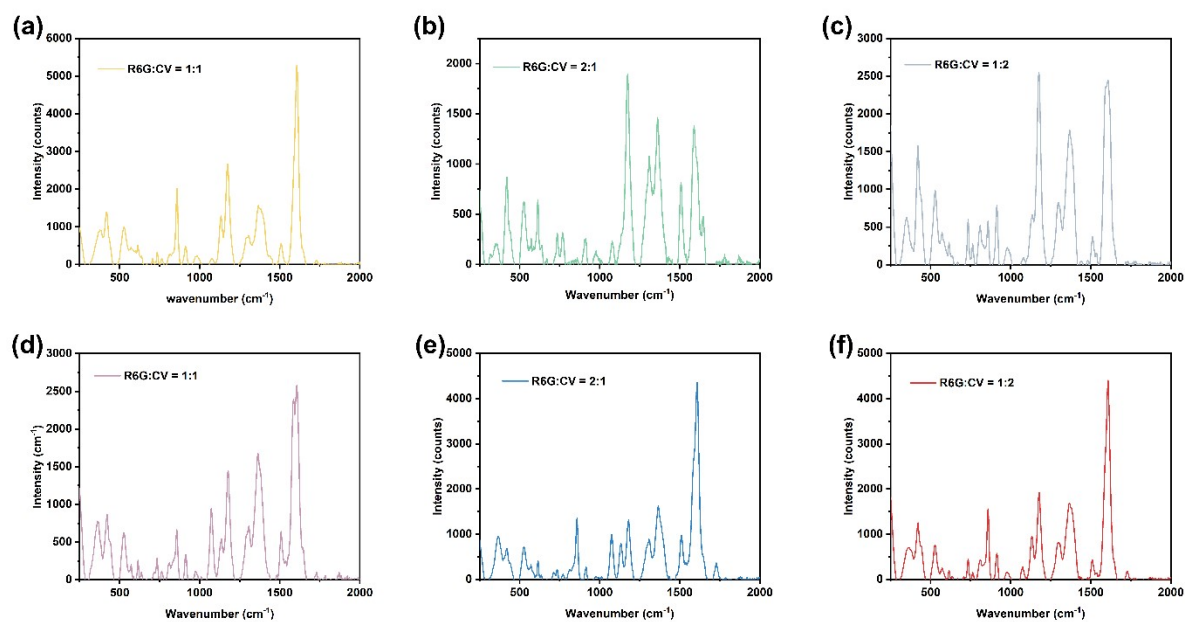

**Figure S7** Raman spectra of (a-c) mixed CV and R6G with the concentration of  $10^{-5}$  M and (d-f) mixed CV and R6G with the concentration of  $10^{-6}$  M
